# Supplementary material for: Insights into the genetic diversity, recombination, and systemic infections with evidence of intracellular maturation of hepadnavirus in cats
Source: PubMed Central journal article supplement (PMC7584178; doi:10.1371/journal.pone.0241212), 2020-10-23
Supplement: pone.0241212.s002.pdf [file pone.0241212.s002.pdf]

1 **Insights into the genetic diversity, recombination, and systemic infections with**  
2 **evidence of intracellular maturation of hepadnavirus in cats**

3  
4 **Chutchai Piewbang<sup>1,2</sup>, Sabrina Wahyu Wardhani<sup>2,3</sup>, Surangkanang Chaiyasak<sup>4</sup>, Jakarwan**  
5 **Yostawonkul<sup>3,5</sup>, Poowadon Chai-in<sup>5</sup>, Suwimon Boonrungsiman<sup>5</sup>, Tanit Kasantikul<sup>6</sup>,**  
6 **Somporn Techangamsuwan<sup>1,2,\*</sup>**

7  
8 **S1 Table.** The DCH-specific primers used for the full-length genome characterization. The  
9 primers were designed based on an alignment of the three DCH genomes that were available in  
10 GenBank.

| <b>Primer name</b>           | <b>Sequence (5'-3')</b> |
|------------------------------|-------------------------|
| <b>DCH_454F</b>              | ATCCCGTCATCATGGGCTT     |
| <b>DCH_1284R</b>             | GGACGTAGACGAAGGACACGT   |
| <b>DCH_2113F<sup>a</sup></b> | TTGGCACCTGGATTCGCA      |
| <b>DCH_605R<sup>a</sup></b>  | AGATGTTCCACACTCTTAGCC   |
| <b>DCH_1205F</b>             | CCATCGATTTACACACTTCCCA  |
| <b>DCH_2175R<sup>a</sup></b> | ATAACCGTATGCTCCGGAAG    |
| <b>DCH_2180F<sup>a</sup></b> | GTGCTCTGATAACCGTATGCTC  |
| <b>DCH_1926R<sup>a</sup></b> | CTAGAATGGCTACATGGGGTTAG |
| <b>DCH_1205F*</b>            | CCATCGATTTACACACTTCCCA  |
| <b>DCH_2180R*</b>            | GTGCTCTGATAACCGTATGCTC  |

11 \* Primer used for extending and re-amplifying the potential recombination break points

12 <sup>a</sup> Primers derived from Aghazadeh et al. (6)

13
