# Supplementary material for: Insights into the genetic diversity, recombination, and systemic infections with evidence of intracellular maturation of hepadnavirus in cats
Source: PubMed Central journal article supplement (PMC7584178; doi:10.1371/journal.pone.0241212), 2020-10-23
Supplement: pone.0241212.s003.pdf [file pone.0241212.s003.pdf]

1 **Insights into the genetic diversity, recombination, and systemic infections with**  
2 **evidence of intracellular maturation of hepadnavirus in cats**

3

4 **Chutchai Piewbang<sup>1,2</sup>, Sabrina Wahyu Wardhani<sup>2,3</sup>, Surangkanang Chaiyasak<sup>4</sup>, Jakarwan**  
5 **Yostawonkul<sup>3,5</sup>, Poowadon Chai-in<sup>5</sup>, Suwimon Boonrungsiman<sup>5</sup>, Tanit Kasantikul<sup>6</sup>,**  
6 **Somporn Techangamsuwan<sup>1,2,\*</sup>**

7

8 **S1 File. Amplification protocols used for characterization of the full-length DCH genome.**

9 The PCR amplifications were performed using the primers described in S1Table with 5 µL of  
10 extracted DNA and 10 µM final concentration of each primer in a final reaction volume of 50 µL  
11 of Qiagen OneStep RT master mix (Qiagen, Hilden, Germany), as per the manufacturer's protocol.  
12 The thermal cycling was performed at 50 °C for 30 min, 95 °C for 5 min, followed by 40 cycles  
13 of 95 °C for 1 min, 55 °C for 2 s, and 72 °C for 2 min, and then a final 72 °C for 10 min.

14
