# Supplementary material for: Insights into the genetic diversity, recombination, and systemic infections with evidence of intracellular maturation of hepadnavirus in cats
Source: PubMed Central journal article supplement (PMC7584178; doi:10.1371/journal.pone.0241212), 2020-10-23
Supplement: pone.0241212.s004.pdf [file pone.0241212.s004.pdf]

1 **Insights into the genetic diversity, recombination, and systemic infections with**  
2 **evidence of intracellular maturation of hepadnavirus in cats**

3

4 **Chutchai Piewbang<sup>1,2</sup>, Sabrina Wahyu Wardhani<sup>2,3</sup>, Surangkanang Chaiyasak<sup>4</sup>, Jakarwan**  
5 **Yostawonkul<sup>3,5</sup>, Poowadon Chai-in<sup>5</sup>, Suwimon Boonrungsiman<sup>5</sup>, Tanit Kasantikul<sup>6</sup>,**  
6 **Somporn Techangamsuwan<sup>1,2,\*</sup>**

7

8 **S2 File. Automated IHC protocol for DCH detection in FFPE tissues of DCH-PCR positive**  
9 **moribund cats**

10 Briefly, IHC analysis was executed on the Leica Microsystems Bond maX System (Leica  
11 Microsystems, IL, USA). Slides were initially incubated for 60 min at 60 °C and then treated  
12 with Bond Dewax Solution (Leica Microsystems). Epitope retrieval was performed by  
13 incubating the sections in Bond Epitope Retrieval Solution 2 (Leica Microsystems) for 30 min at  
14 100 °C. The IHC analysis was performed using the Bond Polymer Refine Detection kit (Leica  
15 Microsystems), a three-step indirect immune-peroxidase technique. The primary antibody  
16 against HBcAg used in the manual IHC was applied for 40 min at room temperature followed by  
17 three consecutive rinses with Bond Wash Solution (Leica Microsystems). Then, 3% (v/v) H<sub>2</sub>O<sub>2</sub>  
18 was applied for 5 min and rinsed off three times with Bond Wash Solution. Next, the Post  
19 Primary Polymer (Leica Microsystems) was applied for 10 min, rinsed three times as above  
20 before the Polymer Poly-HRP IgG (Leica Microsystems) was applied for 10 min, rinsed three  
21 times as above and then once with dH<sub>2</sub>O before the DAB chromogen was applied for 5 min,  
22 followed by triple dH<sub>2</sub>O rinses. Slides were subsequently counterstained with hematoxylin. A  
23 HBV-infected human liver section and cat sections incubated with normal rabbit IgG NI01 slide,  
24 as used in the manual IHC, served as positive and negative controls, respectively.
